# Supplementary material for: Poly[diaquo(1,10-phenanthroline-κ2N1:N10)(μ2-sulphato-κ2O:O′)copper(ii)]: hydrothermal synthesis, crystal structure and magnetic properties
Source: Royal Society of Chemistry journal article supplement (doi:10.1039/c6ra03493d), 2016-01-01
Supplement: c6ra03493d1.pdf [file c6ra03493d1.pdf]

## Supporting information

**Table S1** Fractional atomic coordinates and isotropic or equivalent isotropic displacement parameters ( $\text{\AA}^2$ )

|      | <i>x</i>      | <i>y</i>      | <i>z</i>     | $U_{\text{iso}}^*/U_{\text{eq}}$ |
|------|---------------|---------------|--------------|----------------------------------|
| Cu1  | 0.0000        | 0.549374 (13) | 0.2500       | 0.0239                           |
| O2   | -0.33143 (13) | 0.55168 (6)   | 0.28700 (8)  | 0.0342                           |
| S3   | -0.5000       | 0.61063 (3)   | 0.2500       | 0.0234                           |
| O4   | -0.45010 (12) | 0.67416 (6)   | 0.17315 (7)  | 0.0306                           |
| O5   | 0.09159 (12)  | 0.64655 (6)   | 0.34787 (6)  | 0.0279                           |
| N6   | -0.07697 (15) | 0.43982 (7)   | 0.15978 (8)  | 0.0255                           |
| C7   | -0.04169 (15) | 0.35214 (8)   | 0.20117 (9)  | 0.0241                           |
| C8   | -0.08399 (18) | 0.26451 (10)  | 0.15311 (11) | 0.0331                           |
| C9   | -0.1675 (2)   | 0.27090 (12)  | 0.05694 (12) | 0.0434                           |
| C10  | -0.2044 (2)   | 0.35913 (13)  | 0.01553 (11) | 0.0455                           |
| C11  | -0.1572 (2)   | 0.44304 (10)  | 0.06912 (10) | 0.0354                           |
| C12  | -0.0404 (2)   | 0.17606 (9)   | 0.20395 (13) | 0.0418                           |
| H91  | -0.1984       | 0.2135        | 0.0221       | 0.0504*                          |
| H101 | -0.2607       | 0.3659        | -0.0495      | 0.0527*                          |
| H111 | -0.1832       | 0.5059        | 0.0418       | 0.0417*                          |
| H121 | -0.0711       | 0.1161        | 0.1705       | 0.0492*                          |
| H52  | 0.2090        | 0.6593        | 0.3445       | 0.0425*                          |
| H53  | 0.0351        | 0.6995        | 0.3427       | 0.0414*                          |
| O2   | -0.66857 (13) | 0.55168 (6)   | 0.21300 (8)  | 0.0342                           |
| O4   | -0.54990 (12) | 0.67416 (6)   | 0.32685 (7)  | 0.0306                           |
| N6   | 0.07697 (15)  | 0.43982 (7)   | 0.34022 (8)  | 0.0255                           |
| C7   | 0.04169 (15)  | 0.35214 (8)   | 0.29883 (9)  | 0.0241                           |
| C8   | 0.08399 (18)  | 0.26451 (10)  | 0.34689 (11) | 0.0311                           |
| C9   | 0.1675 (2)    | 0.27090 (12)  | 0.44306 (12) | 0.0434                           |
| C10  | 0.2044 (2)    | 0.35913 (13)  | 0.48447 (11) | 0.0455                           |
| C11  | 0.1577 (2)    | 0.44304 (10)  | 0.43088 (10) | 0.0354                           |
| C12  | 0.0404 (2)    | 0.17606 (9)   | 0.29605 (13) | 0.0418                           |
| H91  | 0.1984        | 0.2135        | 0.4779       | 0.0504*                          |
| H101 | 0.2607        | 0.3659        | 0.5495       | 0.0527*                          |
| H111 | 0.1832        | 0.5059        | 0.4582       | 0.0417*                          |
| H121 | 0.0711        | 0.1161        | 0.3295       | 0.0492*                          |

|     |               |               |             |         |
|-----|---------------|---------------|-------------|---------|
| O5  | -0.09159 (12) | 0.64655 (6)   | 0.15213 (6) | 0.0279  |
| H52 | -0.2090       | 0.6593        | 0.1553      | 0.0451* |
| H53 | -0.0351       | 0.6995        | 0.1573      | 0.0414* |
| Cu1 | -1.0000       | 0.549374 (13) | 0.2500      | 0.0239  |
| O2  | 0.33143 (13)  | 0.55168 (6)   | 0.21300 (8) | 0.0342  |

---

**Table S2** Atomic displacement parameters ( $\text{\AA}^2$ )

|     | $U^{11}$ | $U^{22}$ | $U^{33}$ | $U^{12}$ | $U^{13}$ | $U^{23}$ |
|-----|----------|----------|----------|----------|----------|----------|
| Cu1 | 0.0239   | 0.0168   | 0.0239   | 0.0000   | -0.0004  | 0.0000   |
| O2  | 0.0268   | 0.0288   | 0.0464   | 0.0065   | 0.0042   | 0.0108   |
| S3  | 0.0194   | 0.0178   | 0.0323   | 0.0000   | 0.0020   | 0.0000   |
| O4  | 0.0279   | 0.0267   | 0.0372   | 0.0039   | 0.0052   | 0.0064   |
| O5  | 0.0263   | 0.0218   | 0.0353   | -0.0003  | 0.0045   | -0.0052  |
| N6  | 0.0261   | 0.0248   | 0.0248   | -0.0015  | 0.0014   | -0.0007  |
| C7  | 0.0209   | 0.0217   | 0.0306   | -0.0010  | 0.0066   | -0.0027  |
| C8  | 0.0293   | 0.0278   | 0.0445   | -0.0056  | 0.0128   | -0.0107  |
| C9  | 0.0424   | 0.0444   | 0.0439   | -0.0098  | 0.0084   | -0.0218  |
| C10 | 0.0446   | 0.0604   | 0.0294   | -0.0079  | -0.0006  | -0.0130  |
| C11 | 0.0375   | 0.0405   | 0.0261   | -0.0014  | -0.0012  | -0.0010  |
| C12 | 0.0425   | 0.0218   | 0.0662   | -0.0046  | 0.0239   | -0.0097  |
| O2  | 0.0268   | 0.0288   | 0.0464   | -0.0065  | 0.0042   | -0.0108  |
| O4  | 0.0279   | 0.0267   | 0.0372   | -0.0039  | 0.0052   | -0.0064  |
| N6  | 0.0261   | 0.0248   | 0.0248   | 0.0015   | 0.0014   | 0.0007   |
| C7  | 0.0209   | 0.0217   | 0.0306   | 0.0010   | 0.0066   | 0.0027   |
| C8  | 0.0293   | 0.0278   | 0.0445   | 0.0056   | 0.0128   | 0.0107   |
| C9  | 0.0424   | 0.0444   | 0.0439   | 0.0098   | 0.0084   | 0.0218   |
| C10 | 0.0446   | 0.0604   | 0.0294   | 0.0079   | -0.0006  | 0.0130   |
| C11 | 0.0375   | 0.0405   | 0.0261   | 0.0014   | -0.0012  | 0.0010   |
| C12 | 0.0425   | 0.0218   | 0.0662   | 0.0046   | 0.0239   | 0.0097   |
| O5  | 0.0263   | 0.0218   | 0.0353   | 0.0003   | 0.0045   | 0.0052   |
| Cu1 | 0.0239   | 0.0168   | 0.0239   | 0.0000   | -0.0004  | 0.0000   |
| O2  | 0.0268   | 0.0288   | 0.0464   | -0.0065  | 0.0042   | -0.0108  |

**Table S3** Geometric parameters (Å, °)

|              |           |               |           |
|--------------|-----------|---------------|-----------|
| Cu1-O2       | 2.464     | C7-C8         | 1.400 (2) |
| Cu1-O5       | 1.9702    | C8-C9         | 1.407 (2) |
| Cu1-N6       | 2.005     | C8-C12        | 1.430 (2) |
| O2-S3        | 1.4620    | C9-C10        | 1.362 (2) |
| S3-O4        | 1.491     | C9-H91        | 0.943     |
| O5-H52       | 0.8504    | C10-C11       | 1.400 (2) |
| O5-H53       | 0.8296    | C10-H101      | 0.954     |
| N6-C7        | 1.354 (2) | C11-H111      | 0.958     |
| N6-C11       | 1.327 (2) | C12-H121      | 0.963     |
|              |           |               |           |
| O2-Cu1-O5    | 92.83     | O2-Cu1-N6     | 89.00     |
| O2-Cu1-N6    | 92.12     | O2-Cu1-O5     | 86.16     |
| O2-Cu1-O2    | 178.52    | O5-Cu1-N6     | 173.76    |
| O5-Cu1-N6    | 92.02     | O5-Cu1-O5     | 94.06     |
| O5-Cu1-O2    | 86.16     | N6-Cu1-N6     | 81.94     |
| N6-Cu1-O5    | 92.02     | Cu1-O2-S3     | 131.63    |
| O2-S3-O4     | 108.82    | O2-S3-O2      | 112.27    |
| O2-S3-O4     | 109.49    | O4-S3-O4      | 107.85    |
| Cu1-O5-H52   | 107.97    | Cu1-O5-H53    | 116.22    |
| H52-O5-H53   | 105.33    | Cu1-N6-C7     | 112.57    |
| Cu1-N6-C11   | 129.05    | C7-N6-C11     | 118.4 (1) |
| N6-C7-C8     | 123.4 (1) | N6-C7-C7      | 116.5 (1) |
| C8-C7-C7     | 120.1 (1) | C7-C8-C9      | 116.5 (1) |
| C7-C8-C12    | 118.6 (1) | C9-C8-C12     | 124.8 (1) |
| C8-C9-C10    | 120.0 (1) | C8-C9-H91     | 119.1     |
| C10-C9-H91   | 120.8     | C9-C10-C11    | 119.5 (1) |
| C9-C10-H101  | 122.1     | C11-C10-H101  | 118.4     |
| N6-C11-C10   | 122.1 (1) | N6-C11-H111   | 116.8     |
| C10-C11-H111 | 121.1     | C8-C12-H121   | 118.1     |
| C8-C12-C12   | 121.2 (1) | H121-C12-C12  | 120.7     |
| Cu1-N6-C7    | 112.57    |               |           |
|              |           |               |           |
| O5-Cu1-O2-S3 | 89.68     | N6-Cu1-O2-S3  | -96.29    |
| N6-Cu1-O2-S3 | -178.19   | O5-Cu1-O2-S3  | -4.20     |
| O2-Cu1-O2-S3 | 43.00     | O2-Cu1-O5-H52 | -176.60   |

---

|                   |            |                   |            |
|-------------------|------------|-------------------|------------|
| O2-Cu1-O5-H52     | 2.32       | O2-Cu1-O5-H53     | -58.59     |
| O2-Cu1-O5-H53     | 120.32     | N6-Cu1-O5-H52     | 76.5       |
| N6-Cu1-O5-H52     | 91.18      | N6-Cu1-O5-H53     | -165.5     |
| N6-Cu1-O5-H53     | -150.81    | O5-Cu1-O5-H52     | -90.25     |
| O5-Cu1-O5-H53     | 27.75      | O2-Cu1-N6-C7      | -92.27     |
| O2-Cu1-N6-C11     | 88.6       | O2-Cu1-N6-C11     | -92.4      |
| O5-Cu1-N6-C7      | 14.9       | O5-Cu1-N6-C7      | -178.39    |
| O5-Cu1-N6-C11     | -166.2     | O5-Cu1-N6-C11     | 0.5        |
| N6-Cu1-N6-C7      | 0.01       | N6-Cu1-N6-C11     | 178.9      |
| O5-Cu1-N6-C7      | -178.39    | O5-Cu1-N6-C11     | 0.5        |
| O2-Cu1-N6-C7      | 88.70      | O2-Cu1-N6-C7      | -92.27     |
| Cu1-O2-S3-O4      | 3.78       | Cu1-O2-S3-O4      | -113.88    |
| Cu1-O2-S3-O2      | 125.14     | Cu1-N6-C7-C8      | 179.6      |
| Cu1-N6-C7-C7      | -0.0       | Cu1-N6-C7-C7      | -179.1 (1) |
| C11-N6-C7-C8      | 0.5 (2)    | Cu1-N6-C11-C10    | -179.4     |
| Cu1-N6-C11-H111   | -0.1       | C7-C11-N6-C7      | -0.5 (2)   |
| C7-N6-C11-H111    | 178.7      | N6-C7-C8-C9       | -0.0 (2)   |
| N6-C7-C8-C12      | 180.0 (1)  | C7-C7-C8-C9       | 179.5 (1)  |
| C7-C7-C8-C12      | -0.5 (2)   | N6-C7-C7-N6       | 0.0 (2)    |
| N6-C7-C7-C8       | -179.6 (1) | C8-C7-C7-C8       | 0.8 (2)    |
| C7-C8-C9-C10      | -0.5 (2)   | C7-C8-C9-H91      | -179.9     |
| C12-C8-C9-C10     | 179.5 (1)  | C12-C8-C9-H91     | 0.1        |
| C7-C8-C12-H121    | 179.4      | C7-C8-C12-C12     | -0.3 (2)   |
| C9-C8-C12-H121    | -0.6       | C9-C8-C12-C12     | 179.7 (1)  |
| C8-C9-C10-C11     | 0.5 (2)    | C8-C9-C10-H101    | 179.9      |
| H91-C9-C10-C11    | 179.9      | H91-C9-C10-H101   | -0.7       |
| C9-C10-C11-N6     | -0.0 (2)   | C9-C10-C11-H111   | -179.2     |
| H101-C10-C11-N6   | -179.4     | H101-C10-C11-H111 | 1.4        |
| C8-C12-C12-C8     | 0.6 (2)    | C8-C12-C12-H121   | -179.0     |
| H121-C12-C12-H121 | 1.3        |                   |            |

---
